# Supplementary material
Source: HighWire-hosted journal article supplement (https://msphere.asm.org/content/5/3/e00480-20)

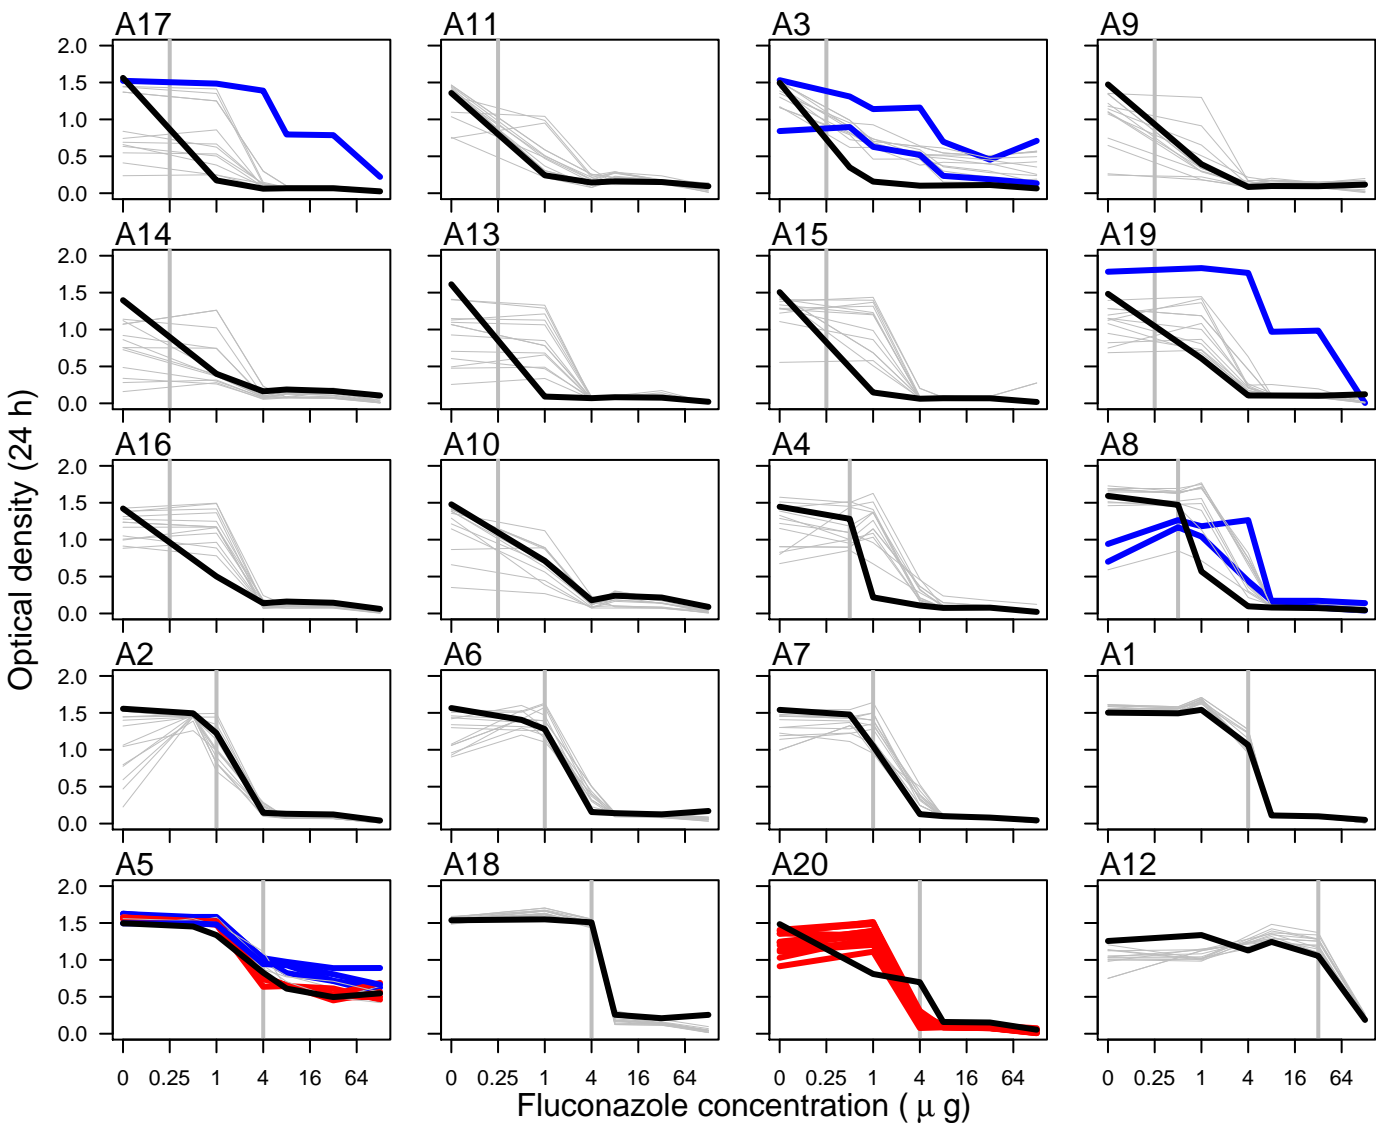

Supplement: inline-supplementary-material-2 [file inline-supplementary-material-2.pdf]
